# Supplementary material
Source: HighWire-hosted journal article supplement (https://erj.ersjournals.com/content/51/2/1701879)
Supplement: inline-supplementary-material-1 [file inline-supplementary-material-1.pdf]

Supplementary Table S1. Palliative care Read codes

---

**Palliative care Read codes**

---

admission to hospice  
admission to hospice for respite  
anticipatory palliative care  
community specialist palliative care  
counselling for end of life issues  
current supportive care for terminal illness  
discharge by palliative care physician  
discharge from hospice  
discharge from hospice  
discharge from hospice day hospital  
discharge from palliative care service  
discharge from palliative care service  
discharged from community specialist palliative care team  
ds 1500 report  
end of life care  
end of life care pathway  
exploring patient's feelings about dying  
full care by hospice  
gsf advance care plan discussion statement  
gsf prognostic indicator stage b (green) - months prognosis  
gsf prognostic indicator stage c (yellow) - weeks prognosis  
gsf prognostic indicator stage d (red) - days prognosis  
gsf supportive care stage 1 - advancing disease  
gsf supportive care stage 2 - increasing decline  
gsf supportv care stge 3 - last days: cat b - mth prognosis  
gsf supportv care stge 3 - last days: cat c - wks prognosis  
gsf supportv care stge 3 - last days: cat d - days prognosis  
has end of life advance care plan  
has end of life care pathway key general practitioner  
has end of life care pathway key worker  
healthcare prof would not be surprised (gsf surprise qu)  
hospice  
hospice - nhs  
integrated care priorities for end of life  
issue of palliative care anticipatory medication box  
issue of palliative care just in case box  
liverpool care pathway for the dying  
notif to primary care oohs of palliative care plan in place  
on end of life care register  
on gold standards palliative care framework  
on liverpool care pathway for the dying  
palliative care  
palliative care - enhanced services administration

palliative care handover form completed  
palliative care plan review  
palliative medicine  
palliative treatment  
patient died in hospice  
patient held palliative care record  
planned supportive care for terminal illness  
preferences relating to death and dying  
preferred place of care - hospice  
preferred place of death: hospice  
prescription of palliative care anticipatory medication  
provision of written information about advance care planning  
refer for terminal care  
refer to terminal care consult  
referral to hospice  
referral to palliative care physician  
referral to palliative care service  
referred to community specialist palliative care team  
routine admission to hospice  
seen by palliative care physician  
seen by palliative care service  
seen in hospice  
shared care - hospice / gp  
specialist palliative care  
specialist palliative care treatment - daycare  
specialist palliative care treatment - inpatient  
specialist palliative care treatment - outpatient  
terminal care  
terminal illness  
terminal illness - early stage  
terminal illness - late stage  
thinking ahead gold standrd advanced care plan disc statemnt  
under care of palliative care physician  
under care of palliative care physician  
under care of palliative care service  
under care of palliative care specialist nurse  
under the care of community palliative care team  
urgent admission to hospice  
[v]palliative care

---
